1 **Combination of tenofovir and emtricitabine with efavirenz does not moderate inhibitory**  
2 **effect of efavirenz on mitochondrial function and cholesterol biosynthesis in human T**  
3 **lymphoblastoid cell line**

4  
5 **Authors:** Min Li<sup>a</sup>, Anuoluwapo Sopeyin<sup>a</sup>, and Elijah Paintsil<sup>a,b,c,#</sup>

6 **Affiliation:** <sup>a</sup>Department of Pediatrics, Yale School of Medicine, New Haven, Connecticut, USA;

7 <sup>b</sup>Department of Pharmacology, Yale School of Medicine, New Haven, Connecticut, USA;

8 <sup>c</sup>Department of Epidemiology & Public Health, Yale School of Medicine, New Haven,  
9 Connecticut, USA

10 **#Correspondence to:** Elijah Paintsil, MD., Departments of Pediatrics, Pharmacology & Public  
11 Health, Yale School of Medicine, 464 Congress Avenue, New Haven, Connecticut 06520, USA.  
12 Phone: 203-785-6101 Fax: 203-785-6961; email: [elijah.paintsil@yale.edu](mailto:elijah.paintsil@yale.edu)

13 **Conflicts of interest:** No conflicts of interest declared by all authors

14

15 **Running Title:** Efavirenz inhibits mitochondrial respiration

16

17

18

19

20 **ABSTRACT**

21 Efavirenz (EFV), the most popular non-nucleoside reverse transcriptase inhibitor, has been  
22 associated with mitochondrial dysfunction in most *in vitro* studies. However, in real life the  
23 prevalence of EFV-induced mitochondrial toxicity is relatively low. We hypothesized that the  
24 agents given in combination with EFV might moderate the effect of EFV on mitochondrial  
25 function. To test this hypothesis, we cultured human T lymphoblastoid cell line (CEM cells) with  
26 EFV alone and in combination with emtricitabine (FTC) and tenofovir disoproxil fumarate (TDF)  
27 to investigate the effects on mitochondrial respiration and function and cholesterol biosynthesis.  
28 There was a statistically significant concentration- and time-dependent apoptosis, reduction in  
29 mitochondrial membrane potential ( $\Delta\Psi$ ), and increase production of reactive oxygen species  
30 (ROS) in cells treated with either EFV alone or in combination with TDF/FTC. EFV treated  
31 cells compared to DMSO treated cells had significant reduction in oxygen consumption rate  
32 (OCR) contributed by mitochondrial respiration, ATP production-linked respiration, and spare  
33 respiratory capacity (SRC). Treatment with EFV resulted in a decrease in mitochondrial DNA  
34 content, and perturbation of more coding genes (n=13); among these were 11 genes associated  
35 with lipid or cholesterol biosynthesis. Our findings support the growing body of knowledge on  
36 the effects of EFV on mitochondrial respiration and function and cholesterol biosynthesis.  
37 Interestingly, combining TDF/FTC with EFV did not alter the effects of EFV on mitochondrial  
38 respiration and function and cholesterol biosynthesis. The gap between the prevalence of EFV-  
39 induced mitochondrial toxicity *in vitro* and *in vivo* studies may be explained by individual  
40 differences in the pharmacokinetic of EFV.

41 **Key words:** Efavirenz, antiretroviral toxicity, mitochondria, respiration, cholesterol biosynthesis

42

## 43 INTRODUCTION:

44           Combination antiretroviral therapy (ART) has resulted in a decrease in AIDS-related  
45 morbidity and mortality (1), though the therapeutic benefit of ART is often limited by delayed  
46 toxicity (2). Although contemporary ART regimens compared to early ART regimens are less  
47 toxic(3, 4), toxicity is still pervasive and affects a significant number of people living with HIV  
48 (4, 5). *In vitro* studies demonstrated that inhibition of polymerase gamma (Pol- $\gamma$ ), enzyme  
49 responsible for mitochondrial DNA replication, by nucleoside reverse transcriptase inhibitors  
50 (NRTIs) leads to depletion of mitochondrial DNA (mtDNA) and subsequent mitochondrial  
51 dysfunction(6, 7); the “Pol- $\gamma$  inhibition” hypothesis. However, there is a growing body of  
52 knowledge to suggest that ART-associated mitochondrial dysfunction cannot be explained solely  
53 by Pol- $\gamma$  inhibition(8, 9). For instance, other classes of ART such as protease inhibitors (PIs) and  
54 non-nucleoside reverse transcriptase inhibitors (NNRTIs) do not inhibit Pol- $\gamma$  and yet they cause  
55 side effects akin to mitochondrial dysfunction(8, 10). Taken together, there must be alternative or  
56 additional mechanisms by which ART impairs mitochondrial function.

57           Efavirenz (EFV), the most popular NNRTI and a key component of several ART  
58 regimens, has been associated with metabolic disorders(11), hepatic toxicity (12, 13), diminished  
59 bone density (14), neuropsychiatric symptoms(15, 16), and neurocognitive impairment (17).  
60 Although the underlying cellular and molecular mechanisms of EFV-induced toxicity are still not  
61 well understood, several *in vitro* and *in vivo* studies have implicated mitochondrial dysfunction  
62 as the underlying mechanism. EFV affections on mitochondria include decrease in mitochondrial  
63 membrane potential, inhibition of OXPHOS complex I enzymes, decrease in oxygen  
64 consumption, and increase production of mitochondrial reactive oxygen species (ROS)(8, 18, 19).

65           With this litany of effects of EFV on mitochondria, one would have expected a much  
66 higher incidence of EFV-associated toxicity in patients. The incidence of severe EFV-associated  
67 neuropsychiatric symptoms is less than 2% of patients (15, 20); and severe hepatic toxicity is up  
68 to 8% of patients (12, 13). In real life, EFV is given in combination with other antiretroviral  
69 agents. We, therefore, hypothesized that the agents given in combination with EFV might  
70 moderate the effect of EFV on mitochondrial function; hence, the relatively low incidence of  
71 EFV-induced mitochondrial toxicity in patients. To test this hypothesis, we cultured human T  
72 lymphoblastoid cell line (CEM cells) with EFV alone and in combination with emtricitabine  
73 (FTC) and tenofovir disoproxil fumarate (TDF) to investigate the effects on mitochondrial  
74 function and cholesterol biosynthesis.

## 75 **RESULTS**

### 76 **EFV treatment decreased CEM cell growth**

77 We treated CEM cells with EFV, TDF/FTC, or TDF/FTC/EFV at multiples of their respective  
78  $C_{max}$  (i.e., 1x-, or 2x- $C_{max}$ ). Growth of cells treated with antiretroviral (ARV) drugs compared to  
79 DMSO-treated cells was monitored. All the ARVs tested affected CEM cell growth to a certain  
80 degree in a concentration- and time-dependent manner except for TDF/FTC combination (Figure  
81 1A). At day 1, EFV treatment (1x-, and 2x- $C_{max}$ ) reduced cell growth more than TDF/FTC/EFV  
82 combination treatment. At day 2, the effect of treatment with EFV alone on cell growth was  
83 comparable to that of treatment with TDF/FTC/EFV combination.

84

### 85 **EFV treatment increased proportion of apoptotic cells**

86 Mitochondria are central to the process of cell apoptosis. We, therefore, investigated the effect of  
87 exposure of CEM cells to EFV, TDF/FTC, or TDF/FTC/EFV on apoptosis. We determined cell

88 death/apoptosis using PI/Annexin-V flow cytometry at day 1 and day 2 (21). Figure 1B  
89 illustrates the fold-change in apoptosis in ARV treated cells compared to DMSO treated cells.  
90 We observed a statistically significant concentration- and time-dependent apoptosis in cells  
91 treated with either EVF alone or in combination with TDF/FTC. There was no statistically  
92 significant difference between cells treated with TDF/FTC at the two concentration and cells  
93 treated with DMSO.

94

#### 95 **EFV treatment decreased mitochondrial membrane potential in cell culture**

96 We next investigated the effect of EFV, TDF/FTC, or TDF/FTC/EFV treatment on  
97 mitochondrial membrane potential ( $\Delta\Psi$ ) of CEM cells using TMRE (tetramethylrhodamine,  
98 ethyl ester). Compared to cells treated with DMSO, cells treated with both concentrations of  
99 EFV or TDF/FTC/EFV showed statistically significant higher proportion of cells with decreased  
100 mitochondrial  $\Delta\Psi$  after 1 and 2 days in culture in a dose- and time-dependent manner (Figure  
101 2A). We did not observe any statistically significant difference between cells treated with  
102 TDF/FTC at the two concentrations compared to cells treated with DMSO.

#### 103 **EFV treatment increased mitochondrial ROS production**

104 Loss of mitochondrial  $\Delta\Psi$  is associated with oxidative stress and, therefore, increased  
105 mitochondrial production of ROS(22). We next investigated whether the decreased in  
106 mitochondrial  $\Delta\Psi$  in cells treated with EFV translated to an increase in production of ROS. ROS  
107 production was determined using MitoSOX™ Red mitochondrial superoxide indicator. As  
108 illustrated in Figure 2B, cells treated with EFV and TDF/FTC/EFV produced significantly higher  
109 ROS compared to cells treated with DMSO in a time-dependent manner. There was no  
110 statistically significant production of ROS in cells treated with TDF/FTC combination on day 1.

### 111 **EFV treatment reduced mitochondrial DNA (mtDNA) content**

112 With the effect of EFV treatment alone and in combination with TDF/FTC on cell growth,  
113 apoptosis, mitochondrial  $\Delta\Psi$ , and ROS production presented above, we investigated whether  
114 these findings are associated with changes in mtDNA content. We determined the mtDNA  
115 content on day 2 of CEM cells treated with EFV, TDF/FTC, or TDF/FTC/EFV compared to cells  
116 treated with DMSO (Figure 2C). We observed a statistically significant decrease in the mtDNA  
117 of CEM cells treated with  $1x-C_{max}$  of EFV and TDF/FTC/EFV. There was no significant change  
118 in mtDNA in cells treated with TDF/FTC compared to cells treated with DMSO.

### 119 **EFV altered mitochondrial respiratory function of CEM cells**

120 We next used a more sensitive extracellular flux analysis to investigate the effect of EFV on  
121 mitochondrial respiratory parameters (23) –basal respiration rate, ATP production-linked rate,  
122 proton leakage rate, maximum respiratory capacity (MRC), spare respiratory capacity (SRC),  
123 and respiratory control ratio (RCR)—in CEM cells. Sequential addition of inhibitors of the  
124 electron transport chain (ETC) –oligomycin, carbonyl cyanide-4-  
125 (trifluoromethoxy)phenylhydrazone, FCCP, and a mixture of rotenone and antimycin—  
126 was used to obtain data on the relative oxygen consumption rate (OCR) of different components  
127 of mitochondrial respiratory function. The relative OCR was computed using the area under the  
128 curve of each component of mitochondrial function as illustrated in Figure 3A. Treatment with  
129 EFV at the two concentrations decreased mitochondrial respiration by about 22% (Figure 3B).  
130 Treatment with TDF/FTC at  $1x C_{max}$  had no effect on mitochondrial respiration, however,  
131 treatment with  $2x C_{max}$  led to a 25% increase in mitochondrial respiration. EFV at  $1x C_{max}$  and  
132  $2x C_{max}$  concentrations decreased the ATP production-linked respiration by 51% and 39%,  
133 respectively. However, there was no significant effect of any of the combination treatment on

134 ATP-production-linked respiration. Treatment with TDF/FTC/EFV at  $2x C_{max}$  reduced MRC by  
135 27% . All the treatment conditions resulted in significant decrease in SRC (ranging from 23%  
136 to 44%) compared to DMSO treatment, except treatment with  $1x C_{max}$  of TDF/FTC. We  
137 computed the parameters in comparison to basal respiration, expressed as a percentage of basal  
138 respiration (Figure 3C), where basal respiration is the combination of mitochondrial and non-  
139 mitochondrial respirations. In DMSO treated cells, about 70% of the basal respiration was used  
140 for ATP production, however, this percentage dropped to 50% with EFV treatment at the two  
141 concentrations (Figure 3C). TDF/FTC treatment did not have an effect on the percentage of basal  
142 respiration used to ATP production. Only treatment with  $2x C_{max}$  TDF/FTC and  $2x C_{max}$   
143 TDF/FTC/EFV had significant decrease in the percentage of MRC used for basal respiration  
144 ( $p < 0.05$ ). Treatment with  $1x C_{max}$  EFV and  $2x C_{max}$  TDF/FTC/EFV caused a significant increase  
145 in proportion of proton leak contributing to basal respiration. All treatments tended to reduce the  
146 relative contribution of SRC to basal respiration, however, only treatment with  $1x C_{max}$   
147 TDF/FTC,  $2x C_{max}$  TDF/FTC, and  $2x C_{max}$  TDF/FTC/EFV led to statistically significant reduction  
148 ( $p < 0.05$ ). Treatment with  $1x C_{max}$  and  $2x C_{max}$  EFV increased the contribution of non-  
149 mitochondrial respiration to basal respiration. The RCR is a sensitive indicator of mitochondrial  
150 dysfunction that is influenced by all components of ETC (18). RCR was computed as the ratio  
151 between the maximal respiration and the respiration rate detected in the presence of oligomycin  
152 (i.e., ATP production-linked respiration). All the treatment conditions tended to decrease RCR  
153 compared to DMSO treatment, however, only treatment with  $2x C_{max}$  of TDF/FTC/EFV resulted  
154 in a statistically significant decrease in RCR (Figure 3D).

155 **Gene expression profiles of CEM cells treated with EFV, TDF, FTC, and TDF/FTC**

156 We investigated the differential gene expression profiles of CEM cell treated with EFV (1x  $C_{max}$ ),  
157 TDF (4x $C_{max}$ ), FTC (4x $C_{max}$ ), and TDF/FTC (4x $C_{max}$ ) using Affymetrix GeneChip Human Gene  
158 2.0 ST arrays. We used 4x $C_{max}$  of TDF and FTC because at lower concentrations, there was no  
159 significant differential gene expression. The number of genes expressed with at least 2-fold  
160 difference over cells treated with DMSO are illustrated in Figure 4A. There were no genes  
161 expressed at the 2-fold threshold with FTC treated cells. Total number of coding genes perturbed  
162 by TDF/FTC treatment was 3. EVF treatment led to perturbation of more coding genes (n=13);  
163 among these were 11 genes associated with lipid or cholesterol biosynthesis. Figures 4B and 4C  
164 illustrate the genes that were either down- or up-regulated by EFV and TDF/FTC treatment,  
165 respectively.

166 **EFV treatment was associated with down-regulation of genes associated with cholesterol**  
167 **biosynthesis**

168 With the finding of downregulation of genes of cholesterol biosynthesis by EFV and previously  
169 reported effect of EFV on the lipogenic transcription factor sterol regulatory element binding  
170 protient-1c (SREBP-1c) (24), we sought to validate our microarray data with quantitative PCR  
171 (Figure 5). Relative gene expression in cells treated with antiretroviral drugs was compared to  
172 gene expression in cells treated with DMSO. Cells treated with EFV had a significant reduction  
173 in 3-hydroxy-3-methylglutaryl-CoA synthases, HMGCS, ( $p<0.01$ ) and 3-hydroxy-3-  
174 methylglutaryl-CoA reductase, HMGCR, ( $p<0.05$ ) expressions (Figure 5A). Combination  
175 treatment with TDF/FTV/EFV also decreased the expressions of HMGCS ( $p<0.01$ ) and HMGCR  
176 ( $p<0.05$ ). TDF/FTC treatment did not have any significant effect on the expressions of HMGCS  
177 and HMGCR. All treatment conditions had significant effect on insulin induced gene-1(INSIG-1)  
178 but not insulin induced gene-2 (INSIG-2) (Figure 5B). EFV treatment resulted in significant



179 expressions of sterol regulatory element binding protein-1 (SREBP1) ( $p < 0.05$ ) (Figure 5C), low  
180 density lipoprotein receptor (LDLR) ( $p < 0.05$ ), and squalene epoxidase (SQLE) ( $p < 0.05$ ) (Figure  
181 5D). None of the treatments compared to DMSO treatment had significant effect on the  
182 expressions of AMP-activated protein kinase (AMPK) –PRKAA1, PRKAA2, and PRKAB  
183 (Figure 5E).

## 184 **DISCUSSION**

185         In this study, we sought to investigate whether combining EFV with TDF/FTC will  
186 moderate reported EFV-associated mitochondrial dysfunction (8, 18, 25-27) and perturbation of  
187 cholesterol biosynthesis (8, 28, 29). Most of the reported EFV-induced toxicities are from *in*  
188 *vitro* studies where cells were treated with EFV alone. However, in real life, EFV is used in  
189 combination with other ARVs such as TDF and FTC. Combination of TDF/FTC/EFV is one of  
190 the most popular ART regimens globally. We conducted comprehensive assessment of  
191 mitochondrial function from mtDNA content to mitochondrial respiration –using extracellular  
192 flux analysis, the gold standard for analyzing mitochondrial respiration in intact cells (18). EFV  
193 treated cells compared to DMSO treated cells had significant reduction in OCR contributed by  
194 mitochondrial respiration, ATP production-linked respiration, and SRC, increased apoptosis,  
195 high proportion of cells with reduced mitochondrial  $\Delta\Psi$ , increased production of ROS, decreased  
196 mtDNA content, and downregulation of genes involved in cholesterol biosynthesis in a dose- and  
197 time-dependent manner. Interestingly, treatment of cells with TDF/FTC/EFV combination had  
198 similar effect on mitochondrial function and cholesterol biosynthesis to treatment with EFV  
199 alone. Thus our findings do not support our hypothesis that agents given in combination with  
200 EFV moderate the effect of EFV on mitochondrial function leading to less prevalence of EFV-

201 induced mitochondrial dysfunction in real time. If any, the effect of TDF and FTC on EFV-  
202 induced toxicity was marginal.

203         The threshold at which mitochondrial dysfunction will translate into toxic phenotype in a  
204 cell is not well understood; it depends on the type and energy requirement of the cell (30). In  
205 CEM cells treated with EFV, we observed a reduction in mitochondrial respiration, ATP  
206 production-linked respiration, and SRC (Figure 3B). These findings are consistent with effect of  
207 EFV on mitochondrial respiratory parameters in human glioma, neuroblastoma, and HepG2 cell  
208 lines (18, 31) and primary cultures of rat neurons and astrocytes (25) reported in previous studies.  
209 In these studies, EVF was cultured with the cells for 1 h to 24 h, while we extended treatment for  
210 48 hrs. The SRC of a cell translates into the ability of the cell to survive and function under high  
211 energy demanding conditions (18). Decrease in SRC has been associated with heart diseases,  
212 neurodegenerative disorders and aging (32). Interestingly, the prevalence of these conditions is  
213 on the rise in HIV treatment-experienced individuals(33, 34). We also observed an increase in  
214 non-mitochondrial respiration with all treatment conditions (Figure 3B). Non-mitochondrial  
215 respiration accounts for other oxygen-consumption processes in the cell that do not involve the  
216 ETC. The increase in non-mitochondrial respiration suggests mitochondria dysfunction leading  
217 to a compromised ETC. Takemoto et al. recently reported that HIV-infected youth with insulin  
218 resistance had lower mitochondrial respiratory parameters and concluded that disordered  
219 mitochondrial respiration may be a potential mechanism of insulin resistant in HIV-infected  
220 youth (35).

221         Moreover, we investigated the effect of EFV on other functions of mitochondria. CEM  
222 cells treated with either EFV alone or in combination with TDF/FTC showed a higher proportion  
223 of non-viable cells (Figure 1A) and increased apoptosis (Figure 1B) in time- and dose-dependent

224 manner. These findings are consistent with other reports; EFV has been reported to decrease cell  
225 viability and increase apoptosis in different cell types –primary human hepatocytes and HepG2  
226 cell line (8, 36), pancreatic cancer cell lines (37), human endothelial cell lines (38), human T  
227 lymphocytes (Jurkat cell lines) (39), and PBMCs (39). Mitochondrial function depends on intact  
228 mitochondrial membrane (40). The loss of mitochondrial  $\Delta\Psi$  is believed to be the first and  
229 crucial step in mitochondrial dysfunction, which triggers a cascade of events leading ultimately  
230 to cell death(27, 41). It is, therefore, not surprising that the effect of EFV on mitochondrial  $\Delta\Psi$   
231 (Figure 2A) paralleled the effect of EFV on apoptosis (Figure 1B). This is consistent with other  
232 studies that reported that treatment with EFV led to reduced mitochondrial  $\Delta\Psi$  in several cell  
233 types(25, 26). Mitochondrial dysfunction and compromise of ETC lead to increase production  
234 of ROS. Treat with EFV alone and in combination with TDF/FTC resulted in a time-dependent  
235 increase in ROS production. This finding is consistent with the effect of EFV on the production  
236 of ROS in hepatocytes (8). Treatment with EFV also resulted in about 50% reduction in mtDNA  
237 compared to treatment with DMSO. Although, EFV does not inhibit Pol- $\gamma$ , we observed mtDNA  
238 depletion in CEM cells treated with  $1 \times C_{\max}$  of EFV; this is consistent with previous report using  
239 human hepatoma cells Huh 7.5 (27). Thus, EFV has several affections on mitochondria. In a  
240 study comparing Hep3B cells with functional mitochondria (rho+) and Hep3B cells lacking  
241 functional mitochondria (rho $^{\circ}$ ), cells with functional mitochondria were more sensitive to the  
242 toxic effects of EFV (42).

243 Mitochondria play a role in cholesterol and lipid metabolism (43). In a microarray  
244 analysis, we observed a downregulation of the expression of cholesterol biosynthesis genes in  
245 CEM cells treated with EFV. We validated these data using qPCR assay to investigate the  
246 expression of genes involved in synthesis (HMGCS, HMGCR), regulation (SREBP1, SREBP2,

247 INSIG-1, INSIG-2, PARKAA1, PRKAA2, PRKAB), and uptake (LDLR, SQLE). EFV treatment  
248 resulted in downregulation of HMGCS, HMGCR, INSIG-1, SREBP1, LDLR, and SQLE.  
249 Intracellular cholesterol is tightly regulated by cholesterol uptake, *de novo* synthesis, and efflux  
250 out of the cell (44). Our findings of downregulation of synthesis, uptake, and regulatory  
251 cholesterol biosynthesis genes imply that EFV might result in accumulation of intracellular  
252 cholesterol. These findings are consistent with the findings of Feeney et al. (44) in a case control  
253 study of expression of cholesterol biosynthesis genes in monocytes of HIV treatment-  
254 experienced, HIV treatment-naïve, and HIV-uninfected individuals. Blas-Garcia et al. also  
255 reported that EFV treatment of Hep3B cells and primary human hepatocytes resulted in  
256 intracellular accumulation of lipids (8). They concluded that EFV-induced mitochondrial  
257 dysfunction resulted in the activation of AMPK leading to intracellular accumulation of lipids. In  
258 our study, EFV did not have significant effect on AMPK (PRKAA1, PRKAA2, PRKAB) (Figure  
259 5D). Moreover, we also observed that cells treated with EFV had decreased in the expression of  
260 INSIG-1. Under normal regulation of cholesterol homeostasis, depletion of intracellular  
261 cholesterol leads to increase expression of INSIG-1 (45). Our finding of decreased expression of  
262 INSIG-1, therefore, supports the hypothesis that EFV treatment may lead to intracellular  
263 accumulation of cholesterol. In contrast, Hadri et al. reported that treatment of human  
264 adipocytes with EFV resulted in depletion of intracellular triglycerides and at the same time a  
265 decrease in the expression of SREBP-1c (24). This differential effect of EFV on intracellular  
266 lipids may be due to the different types of cells or duration of treatment used in these studies.  
267 The  $C_{max}$  of EFV used in our experiments is about 12.7  $\mu$ M, which is within the range of the  
268 plasma concentration of EFV in individuals receiving a daily dose of 600 mg of EFV (3.17 –  
269 12.67  $\mu$ M) (46). There is marked individual variability in plasma concentration of EFV; certain

270 individuals can achieve plasma concentration over and above the  $2x C_{max}$  used in our experiments.  
271 Individuals with certain polymorphisms in the cytochrome P450 (CP450) gene could have  
272 plasma concentrations ranging from 30 – 80  $\mu M$  (47-50). The individual differences in EFV  
273 plasma concentration may partly explain why certain patients on EFV-based therapy do not  
274 experience effects of EFV on mitochondrial function. Ganta et al. detected EFV by HPLC in  
275 purified mitochondrial lysate from Huh 7.5 and HepaRG cells after 12 h of treatment with 6.25  
276  $\mu M$  (27). The investigators explained that since EFV is hydrophilic it can pass freely through the  
277 outer mitochondrial membrane and initiate depolarization of the inner mitochondrial membrane  
278 and subsequent mitochondrial dysfunction (27). This theory may be consistent with the  
279 individual differences in the mitochondrial affections of EFV.

280 Our study, like all *in vitro* studies, has several limitations. First, we could not possibly  
281 mimic or take into account all the complex biological pathways and processes that occur *in vivo*.  
282 Second, the experiments were conducted using a cancer cell line whose cellular bioenergetics  
283 may not be fully comparable to that of primary cells (18). We chose CEM cells because they can  
284 be infected with HIV. Therefore, they can be used to tease out the relative contributions of HIV  
285 infection and ART in mitochondrial dysfunction and cholesterol biosynthesis in future studies.  
286 Third, one might argue that 2 days of culture may not be adequate to tease out the delayed effect  
287 of EFV on mitochondria in real life. However, our duration is consistent with the duration used  
288 in several *in vitro* studies of ART toxicity (51, 52) and the decrease in viability of CEM cells  
289 with EFV treatment did not allow us to go beyond 48 h of culture.

290 In conclusion, EFV treatment resulted in reduction in mitochondrial respiratory  
291 parameters. Moreover, we observed increased apoptosis, high proportion of cells with reduced  
292 mitochondrial  $\Delta\Psi$ , increased production of ROS, decreased mtDNA content, and downregulation

293 of genes involved in cholesterol biosynthesis in cells treated with EFV. Interestingly, combining  
294 TDF/FTC with EFV did not alter the effects of EFV on mitochondrial function. The main  
295 rationale of our study was to understand the gap between reported *in vitro* and *in vivo* EFV-  
296 induced toxicity. This gap may be due to individual differences in the pharmacokinetic of EFV.  
297 EFV can diffuse into the mitochondrial and initiate mitochondrial dysfunction (27). Thus,  
298 individuals who achieve higher tissue concentrations of EFV may have a predilection for EFV-  
299 induced mitochondrial dysfunction. Further studies are needed to elucidate the underlying  
300 mechanisms.

## 301 **METHODS AND MATERIALS**

### 302 **Antiretroviral agents**

303 EFV was obtained from the NIH AIDS Reagent Program (Germantown, MD, USA). FTC and  
304 TDF were purchased from Selleckchem (Houston, TX, USA). All the drugs were dissolved in  
305 dimethyl sulfoxide (DMSO). DMSO was purchased from Sigma-Aldrich (St. Louis, Missouri, USA).

### 306 **Cell culture and cell viability**

307 Human T lymphoblastoid cell line (CEM cells) was cultured in RPMI 1640 supplemented with  
308 10% dialyzed fetal calf serum (Thermo Fisher Scientific, NY, USA). Cells were incubated at  
309 37°C in a 5% CO<sub>2</sub> humidified environment.  $3 \times 10^4$ /ml cells (total volume of 40 ml) were  
310 incubated with EFV, FTC, or TDF at multiples of plasma peak concentration, e.g.,  $1 \times C_{\max}$ , or  
311  $2 \times C_{\max}$ . The cells were collected for cell count and the experiments described below each day.  
312 Aliquots of cells were stained with Trypan blue to distinguish live cell from dead cells and the  
313 number of live cells was counted using hemocytometer. For each treatment condition at least  
314 three cell culture experiments were conducted on different occasions.

315 **Apoptosis assay**

316 Apoptosis was assessed by staining with an FITC Annexin V Apoptosis Detection Kit I (BD, San  
317 Jose, CA) according to the manufacturer's instructions. In brief, the cells cultured with various  
318 concentrations of EFV, TDF/FTC, or TDF/FTC/EFV (1x-, or 2x- $C_{max}$ ) were harvested at day 1  
319 and 2 and then  $1 \times 10^6$  cells were washed with ice-cold PBS. The early apoptotic cells (Annexin  
320 V+/PI-) or late apoptotic cells (Annexin V+/PI+) were evaluated by double staining with annexin  
321 V-FITC and PI and then run on BD LSR II flow cytometer and analyzed with BD FACSDiva  
322 software (San Jose, CA). Each experiment was done in triplicates and repeated on at least three  
323 occasions.

324 **Mitochondrial membrane potential ( $\Delta\Psi$ )**

325 Mitochondrial function depends on intact mitochondria membranes that can maintain an  
326 electrochemical potential generated by the electron transport chain, therefore, mitochondrial  $\Delta\Psi$   
327 is a good measure of mitochondrial functional capacity. Mitochondrial  $\Delta\Psi$  was analyzed using  
328 TMRE-Mitochondrial Membrane Potential Assay Kit (Abcam, Cambridge, MA) according to the  
329 manufacturer's instructions. TMRE (tetramethylrhodamine, ethyl ester) is a cell permeant,  
330 positively-charged, red-orange dye that readily accumulates in active mitochondria due to their  
331 relative negative charge. Depolarized or inactive mitochondria have decreased membrane  
332 potential and fail to sequester TMRE. At day 1 and 2 of treatment, cells were collected and  
333 stained with 200 nM TMRE respectively for 20 min at room temperature. The reaction was  
334 stopped by adding 300  $\mu$ l of PBS and immediately analyzed on BD LSR II flow cytometer (BD,  
335 San Jose, CA) and with BD FACS Diva software. Each experiment was done in triplicates and  
336 repeated on at least three occasions.

### 337 **Mitochondrial reactive oxygen species production**

338 Production of ROS by mitochondria was determined using MitoSOX™ Red mitochondrial  
339 superoxide indicator, a novel fluorogenic dye for highly selective detection of superoxide in the  
340 mitochondria of live cells, accordingly to manufacturer's instructions. Treated cells were washed  
341 once with wash buffer before incubation with 5 µM MitoSOX™ reagent working solution at  
342 room temperature for 10 min. The cells were then washed and run on LSRII flow cytometry  
343 (Beckman Coulter). Each experiment was done in triplicates and repeated on at least three  
344 occasions.

### 345 **Mitochondrial DNA quantification**

346 To assess mtDNA content, genomic DNA was extracted from CEM cells treated with EFV,  
347 TDF/FTC, or TDF/FTC/EFV using TRIzol® Reagent according to manufacturer's instructions.  
348 Fragment of MT-TL1 gene (encodes tRNA leucine 1) and 18 S rRNA nuclear gene were  
349 amplified using quantitative RT-PCR as previously described (53). The primers for  
350 mitochondrial fragment (MIT) and 18S were (MIT Forward, 5'  
351 AGGACAAGAGAAATAAGGCC and MIT Reverse, 5'  
352 TAAGAAGAGGAATTGAACCTCTGACTGTAA) and (18S Forward, 5' TAC CTG GTT GAT  
353 CCT GCC AGT and 18S Reverse, 5' GAT CCT TCC GCA GGT TCA CCT AC), respectively.  
354 Each experiment was done in duplicate and repeated on at least three occasions. The relative  
355 mtDNA content was determined as the ratio of mtDNA to nuclear DNA. Final data for each  
356 treatment condition represent the mean and standard deviation (SD) from at least three cell  
357 culture experiments.

### 358 **Mitochondrial respiratory function**



359 Mitochondrial respiratory function was determined using the Seahorse XF-96 Extracellular Flux  
360 Analyzer (Agilent Technologies, Inc., Wilmington, DE, USA) according to manufacturer's  
361 instructions ([www.agilent.com/en-us/products/cell-analysis-\(seahorse\)/basic-procedures-to-run-](http://www.agilent.com/en-us/products/cell-analysis-(seahorse)/basic-procedures-to-run-an-xf-assay)  
362 [an-xf-assay](http://www.agilent.com/en-us/products/cell-analysis-(seahorse)/basic-procedures-to-run-an-xf-assay)) and as previously published (18, 35). In brief, the Agilent Seahorse uses modulators  
363 of respiration that target components of the electron transport chain. The compounds  
364 (oligomycin, FCCP, and a mix of rotenone and antimycin A) were serially injected to measure  
365 ATP production, maximal respiration, and non-mitochondrial respiration, respectively. Proton  
366 leak and spare respiration capacity (SRC) were then calculated using these parameters and basal  
367 respiration. Treated CEM cells were seeded at a density of  $1.2 \times 10^5$  cells per well in triplicate in  
368 a 1% gelatin treated 96 -well plate. Then, the sensor cartridge was load with oligomycin, FCCP,  
369 and a mixture of rotenone and antimycin A in ports A, B, and C, respectively. The cell culture  
370 plate was then inserted into the analyzer and programed to ensure a homogenous environment.  
371 For each phase, measurements were performed in triplicate, totaling 12 points per trace. To allow  
372 for comparison between different experiments, the data obtained for each condition were  
373 normalized to the cell number per well and expressed as the oxygen consumption rate (OCR) in  
374 pmol/min. The experiment was repeated three times. No significant inter-assay differences were  
375 detected between the three repeats with regard to appearance and viability of cell or the values of  
376 OCR that were obtained.

377

### 378 **Microarray gene expression assay**

379 Total RNA was extracted from cell pellets using TRIzol (Life Technologies, Rockville, MD)  
380 according to manufacturer's instructions. Contaminated genomic DNA was removed by treating  
381 RNA samples with Ambion RNase-free DNase (Thermo Fisher Scientific) for 20 min at 37 C.

382 RNA quantity and quality were assessed by micro-volume spectrophotometry on an Infinite 200  
383 PRO plate reader (Tecan, Männedorf, Switzerland) and by on-chip capillary electrophoresis on a  
384 Bioanalyzer 2100 (Agilent Technologies, Santa Clara, CA), respectively. Absorbance ratio at  
385 260 and 280 nm was  $\geq 1.9$  and the RNA integrity number (RIN) was  $>8$  for all the samples.  
386 100 ng of total RNA was amplified and labeled using the Whole-Transcript Sense Target  
387 Labeling Protocol by Affymetrix (Santa Clara, CA) without ribosomal RNA reduction.  
388 Affymetrix GeneChip Human Gene 2.0 ST arrays were hybridized with 11  $\mu\text{g}$  of labeled sense  
389 DNA, washed, stained, and scanned on an Affymetrix 7G Scanner according to the  
390 manufacturer's protocols. Each experiment was repeated on at least three occasions. Affymetrix  
391 Transcriptome Analysis Console TAC 3.1 was used to analyze the result. One-Way ANOVA  
392 was used and significance was achieved when fold change was  $\geq 2$  and a p-value of  $< 0.05$ .

393

394 **Quantitative real-time polymerase chain reaction for expression of cholesterol biosynthesis**  
395 **genes**

396 RNA was extracted from aliquots of EFV-, TDF/FTC-, or TDF/FTC/EFV-treated cells using  
397 TRIzol Reagent (ThermoFisher Scientific, Carlsbad, CA) according to the manufacturer's  
398 instructions and used in quantitative real-time PCR as previously described (54). Melting curve  
399 analysis was performed after the completion of PCR to assess the possibility of false-positive  
400 results. All of the samples were run in duplicate in at least three independent experiments. The  
401 genes of interest were HMGCS, HMGCR, SREBP-1 and -2, INSIG-1 and -2, LDLR, SQLE) and  
402 AMPK – PRKAA1, PRKAA2 and PRKAB. The primers are listed in Supplementary Table 1.  
403 The gene encoding glyceraldehyde 3-phosphate dehydrogenase (GAPDH) was used as an  
404 internal control for all reactions. The threshold cycle (CT) values of the genes were determined

405 for each treatment condition. The fold-change in gene expression was calculated as  $2^{\Delta\Delta CT}$ ; where  
406  $\Delta\Delta CT = \Delta CT_{(treated)} - \Delta CT_{(control)}$ ;  $\Delta CT_{(treated)} = (CT_{(gene\ of\ interest)} - CT_{(GAPDH)})$ ;  $\Delta CT_{(control)} = (CT_{(gene\ of\ interest)} - CT_{(GAPDH)})$ .

#### 408 **Data and statistical analysis**

409 All statistical analyses were performed with GraphPad Prism software with the Student's t-test.  
410 Data are expressed as means  $\pm$  SD and significance was achieved when p value was  $<0.05$ .

411

#### 412 **Acknowledgements**

413 This study was supported by grants from the National Institutes of Health (KO8AI074404 and  
414 R01 HD074252 to EP). AS was supported by an IDSA Medical Scholar Award.

415

416

417

418

419

420

421

422

423

424 **REFERENCES**

- 425 1. Collaboration H-C, Ray M, Logan R, Sterne JA, Hernandez-Diaz S, Robins JM, Sabin C,  
426 Bansi L, van Sighem A, de Wolf F, Costagliola D, Lanoy E, Bucher HC, von Wyl V,  
427 Esteve A, Casbona J, del Amo J, Moreno S, Justice A, Goulet J, Lodi S, Phillips A, Seng  
428 R, Meyer L, Perez-Hoyos S, Garcia de Olalla P, Hernan MA. 2010. The effect of  
429 combined antiretroviral therapy on the overall mortality of HIV-infected individuals.  
430 *AIDS* 24:123-137.
- 431 2. Gardner K, Hall PA, Chinnery PF, Payne BA. 2013. HIV Treatment and Associated  
432 Mitochondrial Pathology: Review of 25 Years of in Vitro, Animal, and Human Studies.  
433 *Toxicol Pathol* doi:10.1177/0192623313503519.
- 434 3. Di Biagio A, Cozzi-Lepri A, Prinapori R, Angarano G, Gori A, Quirino T, De Luca A,  
435 Costantini A, Mussini C, Rizzardini G, Castagna A, Antinori A, d'Arminio Monforte A,  
436 Group IFS. 2016. Discontinuation of Initial Antiretroviral Therapy in Clinical Practice:  
437 Moving Toward Individualized Therapy. *J Acquir Immune Defic Syndr* 71:263-271.
- 438 4. Gonzalez-Serna A, Chan K, Yip B, Chau W, McGovern R, Samji H, Lima VD, Hogg RS,  
439 Harrigan R. 2014. Temporal trends in the discontinuation of first-line antiretroviral  
440 therapy. *J Antimicrob Chemother* 69:2202-2209.
- 441 5. Cicconi P, Cozzi-Lepri A, Castagna A, Trecarichi EM, Antinori A, Gatti F, Cassola G,  
442 Sighinolfi L, Castelli P, d'Arminio Monforte A, Group ICFS. 2010. Insights into reasons  
443 for discontinuation according to year of starting first regimen of highly active  
444 antiretroviral therapy in a cohort of antiretroviral-naive patients. *HIV Med* 11:104-113.
- 445 6. Lewis W, Dalakas MC. 1995. Mitochondrial toxicity of antiviral drugs. *Nat Med* 1:417-  
446 422.

- 447 7. Chen CH, Cheng YC. 1989. Delayed cytotoxicity and selective loss of mitochondrial  
448 DNA in cells treated with the anti-human immunodeficiency virus compound 2',3'-  
449 dideoxycytidine. *J Biol Chem* 264:11934-11937.
- 450 8. Blas-Garcia A, Apostolova N, Ballesteros D, Monleon D, Morales JM, Rocha M, Victor  
451 VM, Esplugues JV. 2010. Inhibition of mitochondrial function by efavirenz increases  
452 lipid content in hepatic cells. *Hepatology* 52:115-125.
- 453 9. Apostolova N, Blas-Garcia A, Esplugues JV. 2011. Mitochondrial interference by anti-  
454 HIV drugs: mechanisms beyond Pol-gamma inhibition. *Trends Pharmacol Sci* 32:715-  
455 725.
- 456 10. Deng W, Baki L, Yin J, Zhou H, Baumgarten CM. 2010. HIV protease inhibitors elicit  
457 volume-sensitive Cl<sup>-</sup> current in cardiac myocytes via mitochondrial ROS. *J Mol Cell*  
458 *Cardiol* 49:746-752.
- 459 11. Haubrich RH, Riddler SA, DiRienzo AG, Komarow L, Powderly WG, Klingman K,  
460 Garren KW, Butcher DL, Rooney JF, Haas DW, Mellors JW, Havlir DV, Team  
461 ACTGAS. 2009. Metabolic outcomes in a randomized trial of nucleoside, nonnucleoside  
462 and protease inhibitor-sparing regimens for initial HIV treatment. *AIDS* 23:1109-1118.
- 463 12. Rivero A, Mira JA, Pineda JA. 2007. Liver toxicity induced by non-nucleoside reverse  
464 transcriptase inhibitors. *J Antimicrob Chemother* 59:342-346.
- 465 13. Neukam K, Mira JA, Ruiz-Morales J, Rivero A, Collado A, Torres-Cornejo A, Merino D,  
466 de Los Santos-Gil I, Macias J, Gonzalez-Serrano M, Camacho A, Parra-Garcia G, Pineda  
467 JA, Infeciosas SHSTotGHdISAdE. 2011. Liver toxicity associated with antiretroviral  
468 therapy including efavirenz or ritonavir-boosted protease inhibitors in a cohort of  
469 HIV/hepatitis C virus co-infected patients. *J Antimicrob Chemother* 66:2605-2614.

- 470 14. Dave JA, Cohen K, Micklesfield LK, Maartens G, Levitt NS. 2015. Antiretroviral  
471 Therapy, Especially Efavirenz, Is Associated with Low Bone Mineral Density in HIV-  
472 Infected South Africans. *PLoS One* 10:e0144286.
- 473 15. Cavalcante GI, Capistrano VL, Cavalcante FS, Vasconcelos SM, Macedo DS, Sousa FC,  
474 Woods DJ, Fonteles MM. 2010. Implications of efavirenz for neuropsychiatry: a review.  
475 *Int J Neurosci* 120:739-745.
- 476 16. Kenedi CA, Goforth HW. 2011. A systematic review of the psychiatric side-effects of  
477 efavirenz. *AIDS Behav* 15:1803-1818.
- 478 17. Wang Z, Zheng Y, Liu L, Shen Y, Zhang R, Wang J, Lu H. 2013. High prevalence of  
479 HIV-associated neurocognitive disorder in HIV-infected patients with a baseline CD4  
480 count  $\leq$  350 cells/ $\mu$ L in Shanghai, China. *Biosci Trends* 7:284-289.
- 481 18. Funes HA, Blas-Garcia A, Esplugues JV, Apostolova N. 2015. Efavirenz alters  
482 mitochondrial respiratory function in cultured neuron and glial cell lines. *J Antimicrob*  
483 *Chemother* 70:2249-2254.
- 484 19. Anonymous. Panel on Antiretroviral Guidelines for Adult and Adolescents. Guidelines  
485 for the use of antiretroviral agents in HIV-1-infected adults and adolescents. Department  
486 of Health and Human Services. January 29, 2008; 1-128. Accessed 09/25/08.
- 487 20. Scourfield A, Zheng J, Chinthapalli S, Waters L, Martin T, Mandalia S, Nelson M. 2012.  
488 Discontinuation of Atripla as first-line therapy in HIV-1 infected individuals. *AIDS*  
489 26:1399-1401.
- 490 21. Vermes I, Haanen C, Steffens-Nakken H, Reutelingsperger C. 1995. A novel assay for  
491 apoptosis. Flow cytometric detection of phosphatidylserine expression on early apoptotic  
492 cells using fluorescein labelled Annexin V. *J Immunol Methods* 184:39-51.

- 493 22. Ly JD, Grubb DR, Lawen A. 2003. The mitochondrial membrane potential ( $\Delta\psi(m)$ )  
494 in apoptosis; an update. *Apoptosis* 8:115-128.
- 495 23. Brand MD, Nicholls DG. 2011. Assessing mitochondrial dysfunction in cells. *Biochem J*  
496 435:297-312.
- 497 24. El Hadri K, Glorian M, Monsempes C, Dieudonne MN, Pecquery R, Giudicelli Y,  
498 Andreani M, Dugail I, Feve B. 2004. In vitro suppression of the lipogenic pathway by the  
499 nonnucleoside reverse transcriptase inhibitor efavirenz in 3T3 and human preadipocytes  
500 or adipocytes. *J Biol Chem* 279:15130-15141.
- 501 25. Funes HA, Apostolova N, Alegre F, Blas-Garcia A, Alvarez A, Marti-Cabrera M,  
502 Esplugues JV. 2014. Neuronal bioenergetics and acute mitochondrial dysfunction: a clue  
503 to understanding the central nervous system side effects of efavirenz. *J Infect Dis*  
504 210:1385-1395.
- 505 26. Apostolova N, Gomez-Sucerquia LJ, Moran A, Alvarez A, Blas-Garcia A, Esplugues JV.  
506 2010. Enhanced oxidative stress and increased mitochondrial mass during efavirenz-  
507 induced apoptosis in human hepatic cells. *Br J Pharmacol* 160:2069-2084.
- 508 27. Ganta KK, Mandal A, Chaubey B. 2017. Depolarization of mitochondrial membrane  
509 potential is the initial event in non-nucleoside reverse transcriptase inhibitor efavirenz  
510 induced cytotoxicity. *Cell Biol Toxicol* 33:69-82.
- 511 28. Gibellini L, De Biasi S, Nasi M, Carnevale G, Pisciotta A, Bianchini E, Bartolomeo R,  
512 Polo M, De Pol A, Pinti M, Cossarizza A. 2015. Different origin of adipogenic stem cells  
513 influences the response to antiretroviral drugs. *Exp Cell Res* 337:160-169.

- 514 29. Rodriguez de la Concepcion ML, Yubero P, Domingo JC, Iglesias R, Domingo P,  
515 Villarroya F, Giralt M. 2005. Reverse transcriptase inhibitors alter uncoupling protein-1  
516 and mitochondrial biogenesis in brown adipocytes. *Antivir Ther* 10:515-526.
- 517 30. Chacko BK, Kramer PA, Ravi S, Johnson MS, Hardy RW, Ballinger SW, Darley-USmar  
518 VM. 2013. Methods for defining distinct bioenergetic profiles in platelets, lymphocytes,  
519 monocytes, and neutrophils, and the oxidative burst from human blood. *Lab Invest*  
520 93:690-700.
- 521 31. Wang R, Novick SJ, Mangum JB, Queen K, Ferrick DA, Rogers GW, Stimmel JB. 2015.  
522 The acute extracellular flux (XF) assay to assess compound effects on mitochondrial  
523 function. *J Biomol Screen* 20:422-429.
- 524 32. Desler C, Hansen TL, Frederiksen JB, Marcker ML, Singh KK, Juel Rasmussen L. 2012.  
525 Is There a Link between Mitochondrial Reserve Respiratory Capacity and Aging? *J*  
526 *Aging Res* 2012:192503.
- 527 33. Weber R, Ruppik M, Rickenbach M, Spoerri A, Furrer H, Battegay M, Cavassini M,  
528 Calmy A, Bernasconi E, Schmid P, Flepp M, Kowalska J, Ledergerber B, Swiss HIVCS.  
529 2013. Decreasing mortality and changing patterns of causes of death in the Swiss HIV  
530 Cohort Study. *HIV Med* 14:195-207.
- 531 34. Neuhaus J, Angus B, Kowalska JD, La Rosa A, Sampson J, Wentworth D, Mocroft A,  
532 Insight S, groups Es. 2010. Risk of all-cause mortality associated with nonfatal AIDS and  
533 serious non-AIDS events among adults infected with HIV. *AIDS* 24:697-706.
- 534 35. Takemoto JK, Miller TL, Wang J, Jacobson DL, Geffner ME, Van Dyke RB,  
535 Gerschenson M, Pediatric HCS. 2017. Insulin resistance in HIV-infected youth is  
536 associated with decreased mitochondrial respiration. *AIDS* 31:15-23.



- 537 36. Bumpus NN. 2011. Efavirenz and 8-hydroxyefavirenz induce cell death via a JNK- and  
538 BimEL-dependent mechanism in primary human hepatocytes. *Toxicol Appl Pharmacol*  
539 *257:227-234*.
- 540 37. Hecht M, Erber S, Harrer T, Klinker H, Roth T, Parsch H, Fiebig N, Fietkau R, Distel LV.  
541 2015. Efavirenz Has the Highest Anti-Proliferative Effect of Non-Nucleoside Reverse  
542 Transcriptase Inhibitors against Pancreatic Cancer Cells. *PLoS One* *10:e0130277*.
- 543 38. Faltz M, Bergin H, Pilavachi E, Grimwade G, Mabley JG. 2017. Effect of the Anti-  
544 retroviral Drugs Efavirenz, Tenofovir and Emtricitabine on Endothelial Cell Function:  
545 Role of PARP. *Cardiovasc Toxicol* *17:393-404*.
- 546 39. Pilon AA, Lum JJ, Sanchez-Dardon J, Phenix BN, Douglas R, Badley AD. 2002.  
547 Induction of apoptosis by a nonnucleoside human immunodeficiency virus type 1 reverse  
548 transcriptase inhibitor. *Antimicrob Agents Chemother* *46:2687-2691*.
- 549 40. Ricci JE, Waterhouse N, Green DR. 2003. Mitochondrial functions during cell death, a  
550 complex (I-V) dilemma. *Cell Death Differ* *10:488-492*.
- 551 41. Gottlieb E, Armour SM, Harris MH, Thompson CB. 2003. Mitochondrial membrane  
552 potential regulates matrix configuration and cytochrome c release during apoptosis. *Cell*  
553 *Death Differ* *10:709-717*.
- 554 42. Polo M, Alegre F, Funes HA, Blas-Garcia A, Victor VM, Esplugues JV, Apostolova N.  
555 2015. Mitochondrial (dys)function - a factor underlying the variability of efavirenz-  
556 induced hepatotoxicity? *Br J Pharmacol* *172:1713-1727*.
- 557 43. Ribas V, Garcia-Ruiz C, Fernandez-Checa JC. 2016. Mitochondria, cholesterol and  
558 cancer cell metabolism. *Clin Transl Med* *5:22*.

- 559 44. Feeney ER, McAuley N, O'Halloran JA, Rock C, Low J, Satchell CS, Lambert JS,  
560 Sheehan GJ, Mallon PW. 2013. The expression of cholesterol metabolism genes in  
561 monocytes from HIV-infected subjects suggests intracellular cholesterol accumulation. *J*  
562 *Infect Dis* 207:628-637.
- 563 45. Yang T, Espenshade PJ, Wright ME, Yabe D, Gong Y, Aebersold R, Goldstein JL,  
564 Brown MS. 2002. Crucial step in cholesterol homeostasis: sterols promote binding of  
565 SCAP to INSIG-1, a membrane protein that facilitates retention of SREBPs in ER. *Cell*  
566 110:489-500.
- 567 46. Staszewski S, Morales-Ramirez J, Tashima KT, Rachlis A, Skiest D, Stanford J, Stryker  
568 R, Johnson P, Labriola DF, Farina D, Manion DJ, Ruiz NM. 1999. Efavirenz plus  
569 zidovudine and lamivudine, efavirenz plus indinavir, and indinavir plus zidovudine and  
570 lamivudine in the treatment of HIV-1 infection in adults. Study 006 Team. *N Engl J Med*  
571 341:1865-1873.
- 572 47. Kwara A, Lartey M, Sagoe KW, Court MH. 2011. Paradoxically elevated efavirenz  
573 concentrations in HIV/tuberculosis-coinfected patients with CYP2B6 516TT genotype on  
574 rifampin-containing antituberculous therapy. *AIDS* 25:388-390.
- 575 48. Carr DF, la Porte CJ, Pirmohamed M, Owen A, Cortes CP. 2010. Haplotype structure of  
576 CYP2B6 and association with plasma efavirenz concentrations in a Chilean HIV cohort. *J*  
577 *Antimicrob Chemother* 65:1889-1893.
- 578 49. Burger D, van der Heiden I, la Porte C, van der Ende M, Groeneveld P, Richter C,  
579 Koopmans P, Kroon F, Sprenger H, Lindemans J, Schenk P, van Schaik R. 2006.  
580 Interpatient variability in the pharmacokinetics of the HIV non-nucleoside reverse

- 581 transcriptase inhibitor efavirenz: the effect of gender, race, and CYP2B6 polymorphism.  
582 Br J Clin Pharmacol 61:148-154.
- 583 50. Gounden V, van Niekerk C, Snyman T, George JA. 2010. Presence of the CYP2B6 516G>  
584 T polymorphism, increased plasma Efavirenz concentrations and early neuropsychiatric  
585 side effects in South African HIV-infected patients. AIDS Res Ther 7:32.
- 586 51. Lund KC, Peterson LL, Wallace KB. 2007. Absence of a universal mechanism of  
587 mitochondrial toxicity by nucleoside analogs. Antimicrob Agents Chemother 51:2531-  
588 2539.
- 589 52. Birkus G, Hitchcock MJ, Cihlar T. 2002. Assessment of mitochondrial toxicity in human  
590 cells treated with tenofovir: comparison with other nucleoside reverse transcriptase  
591 inhibitors. Antimicrob Agents Chemother 46:716-723.
- 592 53. McComsey GA, Kang M, Ross AC, Lebrecht D, Livingston E, Melvin A, Hitti J, Cohn  
593 SE, Walker UA. 2008. Increased mtDNA levels without change in mitochondrial  
594 enzymes in peripheral blood mononuclear cells of infants born to HIV-infected mothers  
595 on antiretroviral therapy. HIV Clin Trials 9:126-136.
- 596 54. Lu L, Katsaros D, Wiley A, Rigault de la Longrais IA, Puopolo M, Yu H. 2007.  
597 Expression of MDR1 in epithelial ovarian cancer and its association with disease  
598 progression. Oncol Res 16:395-403.

599

600

601

602

603

604

605

606

607

608

609

610

611

612

### 613 **Figure Legends**

614 Figure 1. Effect of efavirenz on cell viability and apoptosis in of CEM cells

615 Human T lymphoblastoid cell line (CEM cells) was treated with multiplicities of the plasma peak  
616 concentrations (1x-, or 2xC<sub>max</sub>) of Efavirenz (EFV), Tenofovir and Emtricitabine (TDF/FTC),  
617 and TDF/FTC/EFV. A. Each day, aliquots of the cell culture were collected and live cells were  
618 counted with Trypan blue staining using hemocytometer, percentage of live cells was compared  
619 with DMSO-treated control cells. B. Apoptosis was assessed by staining with an FITC Annexin  
620 V Apoptosis Detection Kit I. Bar graphs represent proportion of apoptotic cells after 1 and 2  
621 days of treatment compared to DMSO-treated cells. Data represent at least 3 independent

622 experiments and plotted as mean  $\pm$  SD. P-values are two sided and considered significant if  
623  $<0.05$  (\*),  $<0.01$  (\*\*), or  $<0.001$  (\*\*\*)).

624

625 Figure 2. Effect of efavirenz treatment on mitochondrial membrane potential, ROS production  
626 and mitochondrial DNA content. Human T lymphoblastoid cell line (CEM cells) was treated  
627 with multiplicities of the plasma peak concentrations ( $1x$ -, or  $2x C_{max}$ ) of Efavirenz (EFV),  
628 Tenofovir and Emtricitabine (TDF/FTC), and TDF/FTC/EFV. A. At day 1 and 2 the cells were  
629 harvested and interrogated for mitochondrial membrane potential ( $\Delta\Psi$ ) using TMRE-  
630 Mitochondrial Membrane Potential Assay Kit with Flow cytometry. Inactive mitochondria had  
631 decreased membrane potential and failed to sequester TMRE. The bar graph represents the  
632 relative decrease of mitochondrial  $\Delta\Psi$  in cells treated with antiretroviral drugs compared to  
633 DMSO-treated control cells. B. Production of ROS was determined using MitoSOX<sup>TM</sup> assay.  
634 The cells were washed once with wash buffer before incubation with 5  $\mu$ M MitoSOX<sup>TM</sup> reagent  
635 working solution at room temperature for 10 min. The cells were then washed once before  
636 running on LSRII flow cytometry (Beckman Coulter). The bar graph represents the fold change  
637 in ROS production in cells treated with antiretroviral drugs compared to DMSO-treated control  
638 cells. C. The relative mtDNA content was determined on day 2 of culture as the ratio of mtDNA  
639 to nuclear DNA using quantitative PCR. Data represent at least 3 independent experiments and  
640 plotted as mean  $\pm$  SD. P-values are two sided and considered significant if  $<0.05$  (\*),  $<0.01$  (\*\*),  
641 or  $<0.001$  (\*\*\*)).

642

643 Figure 3. Effect of efavirenz treatment on mitochondrial respiratory function.

644 Human T lymphoblastoid cell line (CEM cells) was treated with multiplicities of the plasma peak

645 concentrations ( $1x$ -, or  $2x C_{max}$ ) of Efavirin (EFV), Tenofovir and Emtricitabine (TDF/FTC),  
646 and TDF/FTC/EFV for 2 days. The cells were counted and washed with the calibration medium  
647 and  $1.2 \times 10^5$  cell were added to each of 1% gelatin coated 96 wells in triplication. A sequential  
648 addition of specific inhibitors to mitochondria complex I, II, III and IV: 2 mM oligomycin (I),  
649 0.6 mM FCCP (II), 0.4 mM FCCP (III) and 1 mM rotenone plus 1 mM antimycin A were done  
650 according to manufacturer's instructions. A. Graphical representation of the OCR measurement  
651 over time. To estimate the proportion of OCR coupled to ATP synthesis, oligomycin (an  
652 inhibitor of ATP synthase—Complex V) was injected. To determine the maximal OCR, the  
653 proton ionophore (uncoupler) carbonyl cyanide-4-(trifluoromethoxy)phenylhydrazone (FCCP)  
654 was injected, which stimulates respiration as the mitochondrial inner membrane becomes  
655 permeable to protons and electron transfer is no longer constrained by the proton gradient.  
656 Maximal OCR is controlled by ATP turnover (primarily involving the adenine nucleotide  
657 translocase, phosphate transporter and ATP synthase) and substrate oxidation—substrate uptake,  
658 processing enzymes, relevant ETC complexes, pool sizes of ubiquinone and cytochrome c, and  
659  $O_2$  concentration. Finally, the high-affinity ETC inhibitors rotenone and antimycin A were added  
660 to inhibit the electron flux through Complex I and Complex III, respectively. The remaining  
661 OCR corresponds to the non-mitochondrial (or extramitochondrial) oxygen  $O_2$  consumption. B.  
662 Quantification of the mean OCR in CEM cells exposed to different treatment is shown for  
663 respiration under basal conditions (basal) and after the addition of oligomycin (proton leak) and  
664 FCCP (maximal respiration). The basal respiration rate minus the respiration rate recorded with  
665 oligomycin provides a measure of OCR due to ATP turnover whereas the respiration rate  
666 obtained with FCCP minus the basal  $O_2$  consumption values represents the reserve respiratory  
667 capacity. Non-mitochondrial respiration (rotenone plus antimycin A) was subtracted from each

668 condition. C, Relative parameters of mitochondrial respiratory function and basal respiratory.  
669 The histograms show several parameters where data are expressed as the percentage of basal  
670 respiration (mitochondrial respiration plus non-mitochondrial respiration). D. Representation of  
671 the mean RCR. The RCR was calculated as the ratio between the maximal uncoupled  
672 mitochondrial respiration and mitochondrial respiration. Data (mean  $\pm$ SD; n=3) were compared  
673 with DMSO treated cells and analyzed by Student's t-test. P-values are two sided and considered  
674 significant if  $<0.05$  (\*),  $<0.01$  (\*\*), or  $<0.001$  (\*\*\*)).

675  
676 Figure 4. Effect of Efavirenz treatment on global gene expression.  
677 Human T lymphoblastoid cell line (CEM cells) was treated with  $1x C_{max}$  of Efavirenz (EFV),  
678  $4x C_{max}$  of Tenofovir (TDF), or Emtricitabine (FTC) alone or in combination (TDF/FTC) for two  
679 days. The cells were collected and total RNA was extracted using TRIzol reagent. 100 ng of total  
680 RNA was amplified and labeled using the Whole-Transcript Sense Target Labeling Protocol.  
681 Affymetrix Gene Chip Human Gene 2.0 ST arrays were hybridized and scanned for signals.  
682 Each experiment was repeated on at least three occasions. Affymetrix Transcriptome Analysis  
683 Console TAC 3.1 was used to analyze the result. One-Way ANOVA was used and significance  
684 was achieved when fold change was  $\geq 2$  or ANOVA p-value  $< 0.05$ . A. The number of  
685 differentially expressed genes. B. Genes perturbed by treatment of CEM cells with EVF. C.  
686 Genes perturbed by treatment of CEM cells with TDF/FTC.

687  
688 Figure 5. Effect of Efavirenz treatment on the expression of cholesterol biosynthesis.  
689 Human T lymphoblastoid cell line (CEM cells) was treated with multiplicities of the plasma peak  
690 concentrations ( $1x$ -, or  $2x C_{max}$ ) of Efavirenz (EFV), Tenofovir and Emtricitabine (TDF/FTC), At

691 day 2, the cells were harvested and RNA were extracted. Real-time RT-PCR of selected genes  
692 whose expression levels were normalized to the expression of housekeeping gene-GAPDH. Data  
693 (mean  $\pm$  SD, n = 3), are represented as fold change in expression compared with cells treated  
694 with DMSO. A. Fold change in expressions of HMGCS and HMGCR; B. Fold change in  
695 expressions of INSIG-1 and INSIG-2; C. Fold change in expressions of SREBP1 and SREBP2;  
696 D. Fold change in expressions of LDLR and SQLE; and E. Fold change in expressions of  
697 PRKAA1, PRKAA2, and PRKAB. Data represent at least 3 independent experiments and plotted  
698 as mean  $\pm$  SD. P-values are two sided and considered significant if  $<0.05$  (\*),  $<0.01$  (\*\*), or  $<$   
699  $0.001$  (\*\*\*)).

700

701



## Figure 1

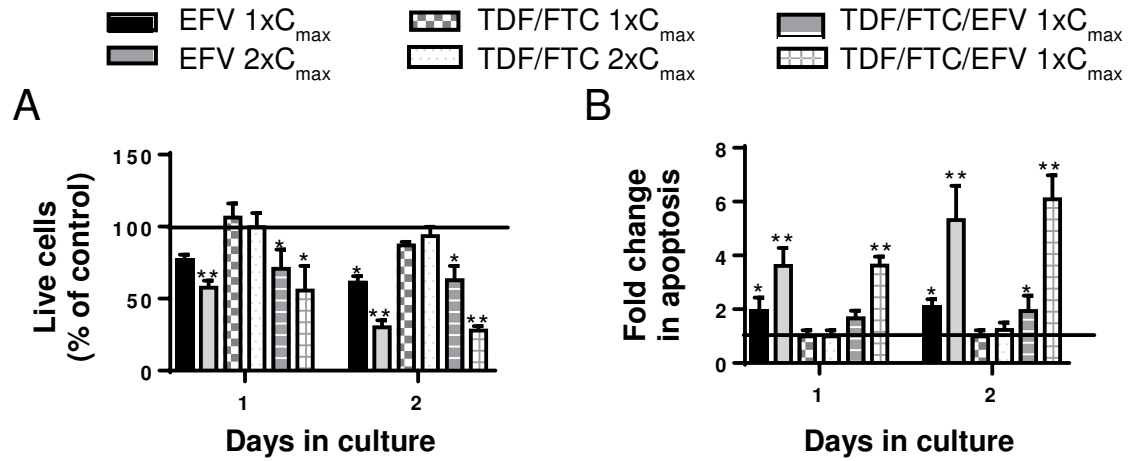

Figure 1. Effect of efavirenz on cell viability and apoptosis in of CEM cells

Human T lymphoblastoid cell line (CEM cells) was treated with multiplicities of the plasma peak concentrations (1x-, or 2x<sub>C<sub>max</sub></sub>) of Efavirenz (EFV), Tenofovir and Emtricitabine (TDF/FTC), and TDF/FTC/EFV. A. Each day, aliquots of the cell culture were collected and live cells were counted with Trypan blue staining using hemocytometer, percentage of live cells was compared with DMSO-treated control cells. B. Apoptosis was assessed by staining with an FITC Annexin V Apoptosis Detection Kit I. Bar graphs represent proportion of apoptotic cells after 1 and 2 days of treatment compared to DMSO-treated cells. Data represent at least 3 independent experiments and plotted as mean ± SD. P-values are two sided and considered significant if <0.05 (\*), < 0.01 (\*\*), or <0.001 (\*\*\*)

## Figure 2

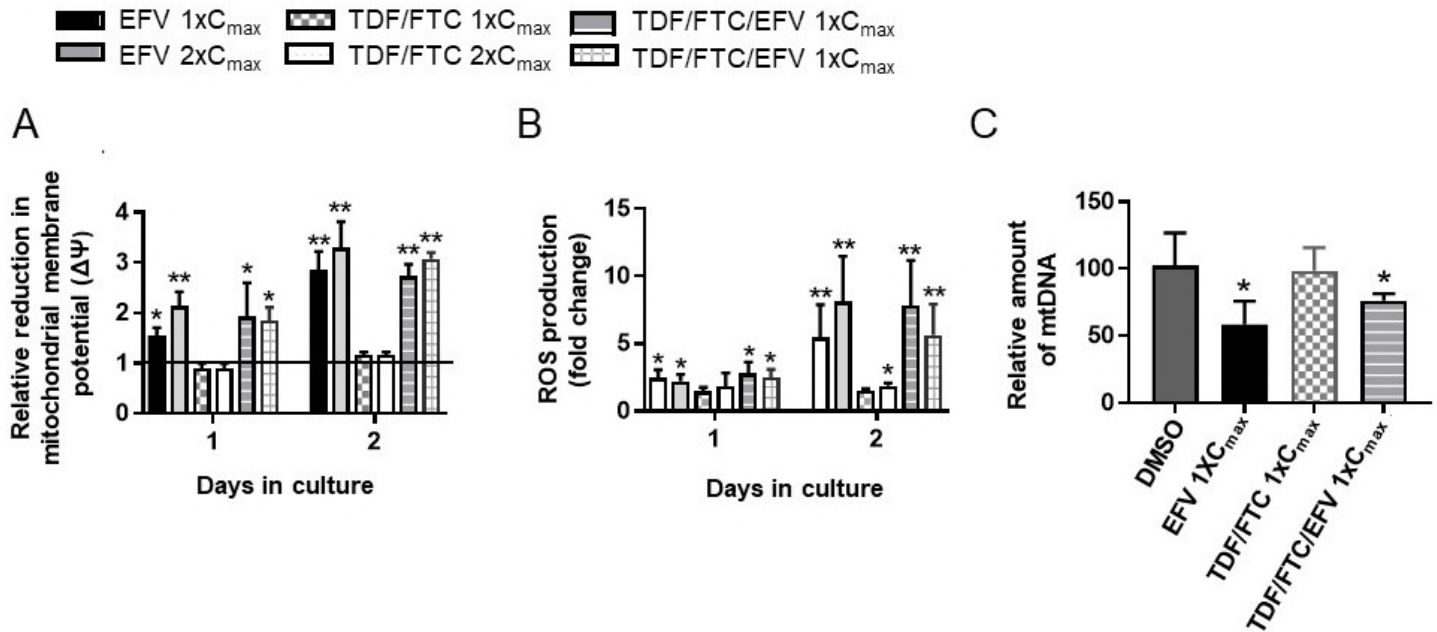

Figure 2. Effect of efavirenz treatment on mitochondrial membrane potential, ROS production and mitochondrial DNA content. Human T lymphoblastoid cell line (CEM cells) was treated with multiplicities of the plasma peak concentrations (1x-, or 2x<sub>C<sub>max</sub></sub>) of Efavirenz (EFV), Tenofovir and Emtricitabine (TDF/FTC), and TDF/FTC/EFV. A. At day 1 and 2 the cells were harvested and interrogated for mitochondrial membrane potential ( $\Delta\Psi$ ) using TMRE-Mitochondrial Membrane Potential Assay Kit with Flow cytometry. Inactive mitochondria had decreased membrane potential and failed to sequester TMRE. The bar graph represents the relative decrease of mitochondrial  $\Delta\Psi$  in cells treated with antiretroviral drugs compared to DMSO-treated control cells. B. Production of ROS was determined using MitoSOX<sup>TM</sup> assay. The cells were washed once with wash buffer before incubation with 5  $\mu$ M MitoSOX<sup>TM</sup> reagent working solution at room temperature for 10 min. The cells were then washed once before running on LSRII flow cytometry (Beckman Coulter). The bar graph represents the fold change in ROS production in cells treated with antiretroviral drugs compared to DMSO-treated control cells. C. The relative mtDNA content was determined on day 2 of culture as the ratio of mtDNA to nuclear DNA using quantitative PCR. Data represent at least 3 independent experiments and plotted as mean  $\pm$  SD. P-values are two sided and considered significant if  $<0.05$  (\*),  $<0.01$  (\*\*), or  $<0.001$  (\*\*\*).

Figure 3

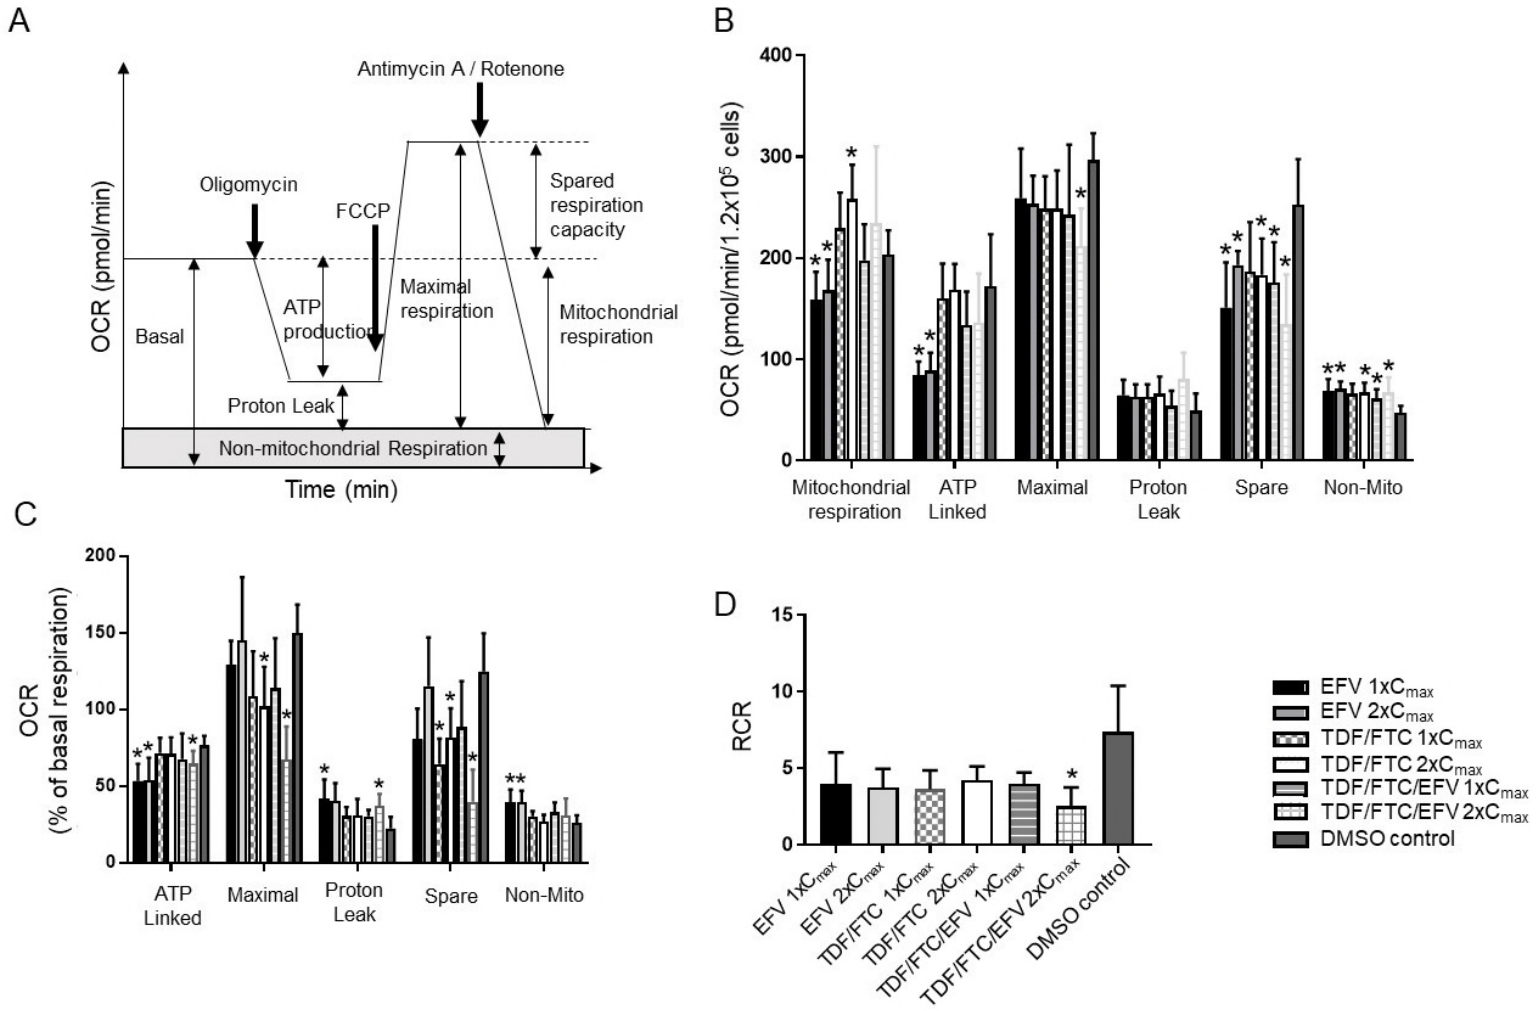

Figure 3. Effect of efavirenz treatment on mitochondrial respiratory function. Human T lymphoblastoid cell line (CEM cells) was treated with multiplicities of the plasma peak concentrations ( $1\times$ , or  $2\times C_{\max}$ ) of Efavirenz (EFV), Tenofovir and Emtricitabine (TDF/FTC), and TDF/FTC/EFV for 2 days. The cells were counted and washed with the calibration medium and  $1.2\times 10^5$  cell were added to each of 1% gelatin coated 96 wells in triplication. A sequential addition of specific inhibitors to mitochondria complex I, II, III and IV: 2 mM oligomycin (I), 0.6 mM FCCP (II), 0.4 mM FCCP (III) and 1 mM rotenone plus 1 mM antimycin A were done according to manufacturer's instructions. A. Graphical representation of the OCR measurement over time. To estimate the proportion of OCR coupled to ATP synthesis, oligomycin (an inhibitor of ATP synthase—Complex V) was injected. To determine the maximal OCR, the proton ionophore (uncoupler) carbonylcyanide-4-(trifluoromethoxy)phenylhydrazone (FCCP) was injected, which stimulates respiration as the mitochondrial inner membrane becomes permeable to protons and electron transfer is no longer constrained by the proton gradient. Maximal OCR is controlled by ATP turnover (primarily involving the adenine nucleotide translocase, phosphate transporter and ATP synthase) and substrate oxidation—substrate uptake, processing enzymes, relevant ETC complexes, pool sizes of ubiquinone and cytochrome c, and  $O_2$  concentration. Finally, the high-affinity ETC inhibitors rotenone and antimycin A were added to inhibit the electron flux through Complex I and Complex III, respectively. The remaining OCR corresponds to the non-mitochondrial (or extramitochondrial) oxygen  $O_2$  consumption. B. Quantification of the mean OCR in CEM cells exposed to different treatment is shown for respiration under basal conditions (basal) and after the addition of oligomycin (proton leak) and FCCP (maximal respiration). The basal respiration rate minus the respiration rate recorded with oligomycin provides a measure of OCR due to ATP turnover whereas the respiration rate obtained with FCCP minus the basal  $O_2$  consumption values represents the reserve respiratory capacity. Non-mitochondrial respiration (rotenone plus antimycin A) was subtracted from each condition. C. Relative parameters of mitochondrial respiratory function and basal respiratory. The histograms show several parameters where data are expressed as the percentage of basal respiration (mitochondrial respiration plus non-mitochondrial respiration). D. Representation of the mean RCR. The RCR was calculated as the ratio between the maximal uncoupled mitochondrial respiration and mitochondrial respiration. Data (mean  $\pm$ SD;  $n=3$ ) were compared with DMSO treated cells and analyzed by Student's t-test. P-values are two sided and considered significant if  $<0.05$  (\*),  $<0.01$  (\*\*), or  $<0.001$  (\*\*\*)

Figure 4

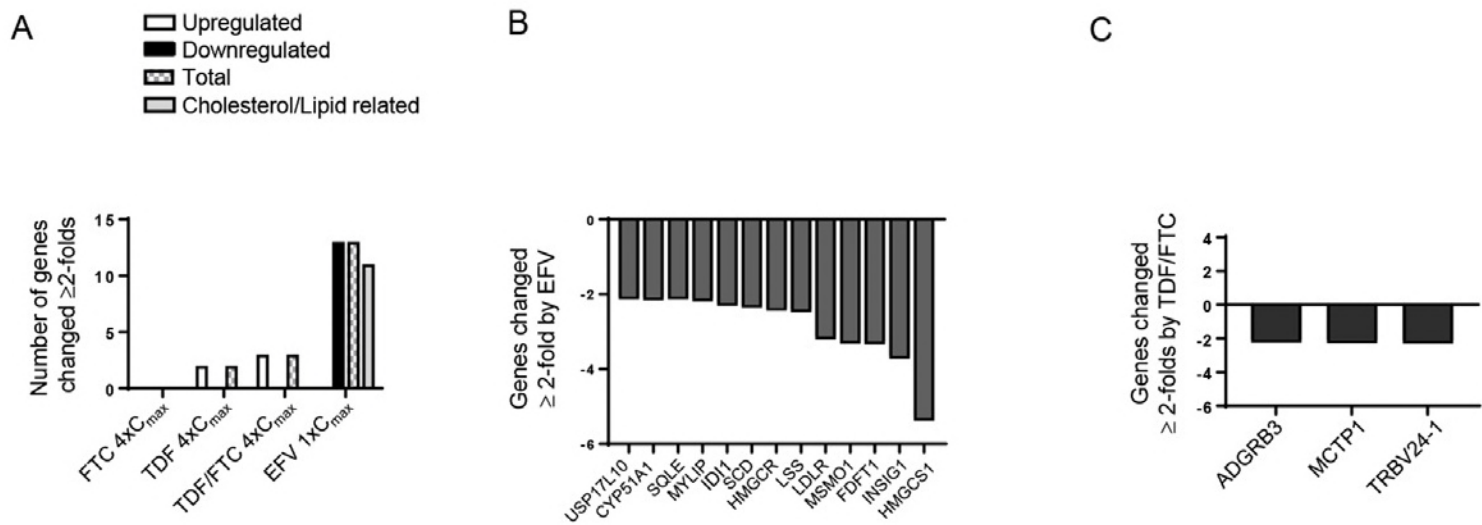

Figure 4. Effect of Efavirenz treatment on global gene expression.

Human T lymphoblastoid cell line (CEM cells) was treated with 1x<sub>C<sub>max</sub></sub> of Efavirenz (EFV), 4x<sub>C<sub>max</sub></sub> of Tenofovir (TDF), or Emtricitabine (FTC) alone or in combination (TDF/FTC) for two days. The cells were collected and total RNA was extracted using TRIzol reagent. 100 ng of total RNA was amplified and labeled using the Whole-Transcript Sense Target Labeling Protocol. Affymetrix Gene Chip Human Gene 2.0 ST arrays were hybridized and scanned for signals. Each experiment was repeated on at least three occasions. Affymetrix Transcriptome Analysis Console TAC 3.1 was used to analyze the result. One-Way ANOVA was used and significance was achieved when fold change was  $\geq 2$  or ANOVA p-value  $< 0.05$ . A. The number of differentially expressed genes. B. Genes perturbed by treatment of CEM cells with EVF. C. Genes perturbed by treatment of CEM cells with TDF/FTC.

## Figure 5

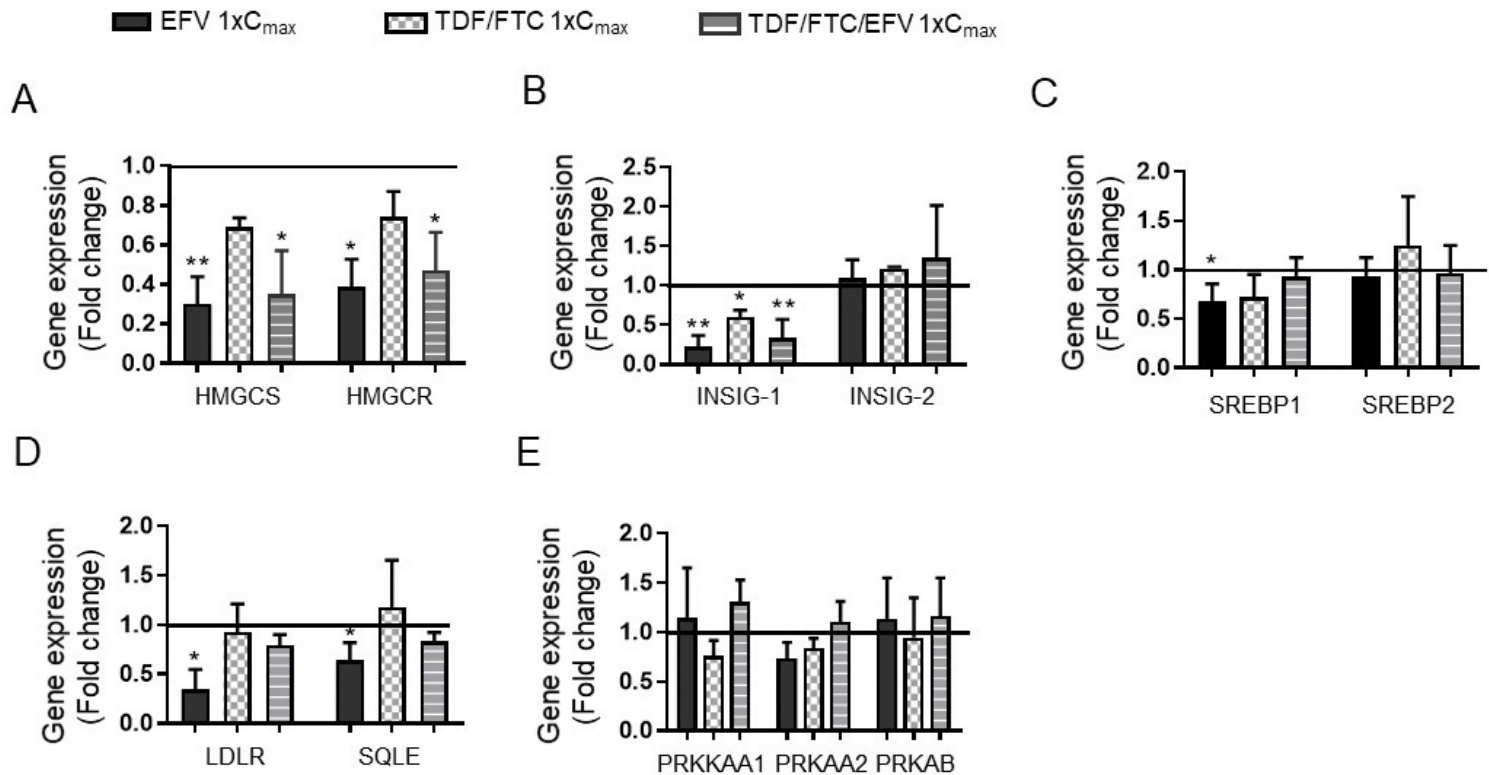

Figure 5. Effect of Efavirenz treatment on the expression of cholesterol biosynthesis.

Human T lymphoblastoid cell line (CEM cells) was treated with multiplicities of the plasma peak concentrations (1x-, or 2x<sub>C</sub><sub>max</sub>) of Efavirenz (EFV), Tenofovir and Emtricitabine (TDF/FTC), At day 2, the cells were harvested and RNA were extracted. Real-time RT-PCR of selected genes whose expression levels were normalized to the expression of housekeeping gene-GAPDH. Data (mean ± SD, n = 3), are represented as fold change in expression compared with cells treated with DMSO. A. Fold change in expressions of HMGCS and HMGCR; B. Fold change in expressions of INSIG-1 and INSIG-2; C. Fold change in expressions of SREBP1 and SREBP2; D. Fold change in expressions of LDLR and SQLE; and E. Fold change in expressions of PRKAA1, PRKAA2, and PRKAB. Data represent at least 3 independent experiments and plotted as mean ± SD. P-values are two sided and considered significant if <0.05 (\*), <0.01 (\*\*), or <0.001 (\*\*).
